# Supplementary material
Source: publisher figshare collection journal article supplement (https://frontiersin.figshare.com/ndownloader/files/32113121)
Supplement: Supplementary file 1 [file 32113121]

## Sheet: ALL
ID	Source	Creator/Channel	Video (Link)	Search Term	Date	Subscribers	Views	Likes	Dislikes	Comments	Duration (min)	Video Style						Creative Presentation Means
												Presentation/Talk	Interview	Graphics/ Animation	How-To/Demo	Voice Over/Video Collage	Mixed Media	Field Expert	Professional Presenter	Public Figure	Lay Person/ Unknown	Plain Background	Contextual Background	Multimedia Means	PowerPoint Type Presentation	Basic Stop-Motion Animation	Advanced Graphic Animation	Narrative	Expository	Humour	Serious
1	Norwegian Health Authorities	Folkehelseinstituttet	Film på norsk om koronavirus og hjemmekarantene og isolasjon	–	16.03.2020	2940	15468	33	4	–	2.20 min	1	0	0	0	0	0	0	0	0	1	1	0	0	0	0	0	0	1	0	1
2	Norwegian Health Authorities	Folkehelseinstituttet	Film på norsk med generell informasjon og råd om koronavirus	–	16.03.2020	2940	7381	28	4	–	2.27 min	0	0	1	0	0	0	0	0	0	0	0	0	0	1	0	0	0	1	0	1
3	Norwegian Health Authorities	Folkehelseinstituttet	Slik bruker du munnbind	–	11.09.2020	2940	882	2	2	–	1.12 min	0	0	0	1	0	0	0	0	0	1	0	1	0	0	0	0	0	1	0	1
4	Norwegian Health Authorities	Folkehelseinstituttet	Smittevernråd til virksomheter med en-til-en kontakt (24. april 2020)	–	27.04.2020	2940	399	4	2	–	3.23 min	0	0	0	1	0	0	0	0	0	1	0	1	0	0	0	0	1	0	0	1
5	Norwegian Health Authorities	Helsedirektoratet	Norges største YouTubere er #sammenalene mot korona	–	08.04.2020	6210	714649	33	39	–	0.20 min	0	0	0	0	1	0	0	0	1	0	0	1	0	0	0	0	1	0	0	1
6	Norwegian Health Authorities	Helsedirektoratet	Slik kan vi stoppe koronaviruset – sammen!	–	31.03.2020	6210	527850	76	63	66	0.55 min	1	0	0	0	0	0	0	0	1	0	0	0	1	0	0	0	1	0	0	1
7	Norwegian Health Authorities	Helsedirektoratet	Hvor skal du ringe hvis du er syk?	–	06.04.2020	6210	523315	38	30	38	0.23 min	0	0	1	0	0	0	0	0	0	0	0	0	0	1	0	0	0	1	0	1
8	Norwegian Health Authorities	Helsedirektoratet	Vi kan ikke gi oss nå!	–	03.04.2020	6210	511513	158	90	249	0.30 min	1	0	0	0	0	0	0	0	1	0	0	0	0	0	0	0	0	1	0	1
9	Norwegian Health Authorities	Helsedirektoratet	Viktig beskjed fra Jonis: hold avstand, vask hendene!	–	08.04.2020	6210	482863	156	72	–	0.19 min	1	0	0	0	0	0	0	0	1	0	0	0	1	0	0	0	1	0	1	0
10	Norwegian Health Authorities	Helsedirektoratet	Informasjon til barn og unge om det nye koronaviruset	–	02.03.2020	6210	457146	2900	1000	–	3.06 min	0	1	0	0	0	0	1	0	0	0	0	0	1	0	0	0	0	1	0	1
11	Norwegian Health Authorities	Helsedirektoratet	Trenger du noen å prate med? Hør på Jonis:	–	08.04.2020	6210	182530	15	16	–	0.20 min	1	0	0	0	0	0	0	0	1	0	0	0	1	0	0	0	1	0	1	0
12	Norwegian Health Authorities	Helsedirektoratet	Viktig fra barna!	–	29.04.2020	6210	69009	567	398	–	0.27 min	0	0	1	0	0	0	0	0	0	0	0	0	0	1	0	0	0	0	0	0
13	Norwegian Health Authorities	Helsedirektoratet	Vær en Sjekkas i sommer! Test deg ved mistanke om koronasmitte	–	01.07.2020	6210	45466	113	56	26	0.17 min	0	0	0	0	0	1	0	0	0	1	0	1	0	0	0	0	1	0	1	0
14	Norwegian Health Authorities	Helsedirektoratet	Kan du se hvem som har økt risiko for alvorlig sykdom?	–	02.06.2020	6210	40233	162	29	25	0.29 min	0	0	0	0	1	0	0	0	0	1	1	0	0	0	0	0	1	0	0	1
15	Norwegian Health Authorities	Helsedirektoratet	Sammen kan vi stoppe smitten. Takk for at du bidrar!	–	12.03.2020	6210	5649	56	17	38	0.30 min	0	0	1	0	0	0	0	0	0	0	0	0	0	1	0	0	0	1	0	1
16	Norwegian Health Authorities	Helsedirektoratet	Du kan gjøre en forskjell. Sammen kan vi stoppe smitten	–	12.03.2020	6210	3483	13	11	33	0.10 min	0	0	1	0	0	0	0	0	0	0	0	0	0	1	0	0	0	1	0	1
17	Norwegian Health Authorities	Helsedirektoratet	Party like it's 2020	–	27.08.2020	6210	2345	53	5	6	0.24 min	0	0	1	0	0	0	0	0	0	0	0	0	0	0	1	0	1	0	1	0
18	Norwegian Health Authorities	Helsedirektoratet	Vet du hvem som er dine nærkontakter?	–	20.10.2020	6210	1235	0	1	–	0.30 min	0	0	0	0	1	0	0	0	0	1	0	0	1	0	0	0	1	0	0	1
19	Norwegian Health Authorities	Helsedirektoratet	Holde seg hjemme, i karantene eller isolasjon?	–	20.03.2020	6210	1226	17	3	1	0.58 min	0	0	1	0	0	0	0	0	0	0	0	0	0	1	0	0	0	1	0	1
20	Norwegian Health Authorities	Helsedirektoratet	Nå er det best å være mest mulig hjemme	–	19.03.2020	6210	727	12	4	2	0.42 min	0	0	1	0	0	0	0	0	0	0	0	0	0	1	0	0	0	1	0	1
21	Norwegian Health Authorities	Helsedirektoratet	Tegnspråktolket: Smitte og inkubasjonstid	–	31.03.2020	6210	466	4	2	0	6.07 min	1	0	0	0	0	0	0	0	0	1	1	0	0	0	0	0	0	1	0	1
22	Norwegian Health Authorities	Helsedirektoratet	Informasjon om munnbind - tegnspråktolket	–	20.08.2020	6210	447	4	2	0	0.35 min	1	0	0	0	0	0	0	0	0	1	0	0	1	0	0	0	0	1	0	1
23	Norwegian Health Authorities	Helsedirektoratet	Tegnspråktolket: Råd om korona til foreldre, barn og unge	–	31.03.2020	6210	301	2	0	–	9.36 min	1	0	0	0	0	0	0	0	0	1	1	0	0	0	0	0	0	1	0	1
24	Norwegian Health Authorities	Helsedirektoratet	Veiledning for gjennomføring av koronatest – spyttprøve	–	17.06.2020	6210	36	0	0	0	2.18 min	0	0	0	1	0	0	0	0	0	1	1	0	0	0	0	0	0	1	0	1
25	Norwegian Health Authorities	Regjeringen	Hilsen til alle barn	–	20.03.2020	507	119	2	0	0	2.21 min	1	0	0	0	0	0	0	0	1	0	0	0	1	0	0	0	1	0	0	1
26	Norwegian Health Authorities	Regjeringen	Takk til alle barn	–	08.04.2020	507	98	3	0	0	1.44 min	0	0	0	0	1	0	0	0	0	1	0	1	0	0	0	0	1	0	0	1
27	WHO	World Health Organisation (WHO)	Novel coronavirus (2019-nCoV)	–	31.01.2020	631000	5551178	29000	1700	1964	4.48 min	0	0	1	0	0	0	0	0	0	0	0	0	0	0	1	0	0	1	0	1
28	WHO	World Health Organisation (WHO)	How to protect yourself against COVID-19	–	28.02.2020	631000	4747162	97000	2200	2193	1.30 min	0	0	1	0	0	0	0	0	0	0	0	0	0	0	1	0	0	1	0	1
29	WHO	World Health Organisation (WHO)	Can masks protect against the new coronavirus infection?	–	05.02.2020	631000	2152314	4700	2100	1913	1.26 min	1	0	0	0	0	0	1	0	0	0	1	0	0	0	0	0	0	1	0	1
30	WHO	World Health Organisation (WHO)	What can people do to protect themselves and others from getting the new coronavirus?	–	05.02.2020	631000	1836484	3500	297	393	1.33 min	1	0	0	0	0	0	1	0	0	0	1	0	0	0	0	0	0	1	0	1
31	WHO	World Health Organisation (WHO)	Why is it recommended to avoid close contact with anyone who has fever and cough?	–	05.02.2020	631000	1174489	9000	5600	369	1.13 min	1	0	0	0	0	0	1	0	0	0	1	0	0	0	0	0	0	1	0	1
32	WHO	World Health Organisation (WHO)	Coronavirus - seven steps to prevent the spread of the virus	–	13.03.2020	631000	1013880	11000	481	490	0.30 min	0	0	1	0	0	0	0	0	0	0	0	0	0	0	1	0	0	1	0	1
33	WHO	World Health Organisation (WHO)	How to wear a fabric mask safely	–	17.06.2020	631000	638936	1800	243	229	2.09 min	0	0	1	0	0	0	0	0	0	0	0	0	0	0	1	0	0	1	0	1
34	WHO	World Health Organisation (WHO)	How is the new coronavirus affecting people who get it?	–	05.02.2020	631000	588568	902	232	183	1.24 min	1	0	0	0	0	0	1	0	0	0	1	0	0	0	0	0	0	1	0	1
35	WHO	World Health Organisation (WHO)	Coronavirus disease (COVID-19)	–	15.06.2020	631000	296294	2900	222	298	5.18 min	0	0	1	0	0	0	0	0	0	0	0	0	0	0	1	0	0	1	0	1
36	WHO	World Health Organisation (WHO)	The Safe Hands challenge	–	13.03.2020	631000	263994	3400	203	274	1.59 min	0	0	0	1	0	0	0	0	1	0	0	1	0	0	0	0	0	1	0	1
37	WHO	World Health Organisation (WHO)	Medical and fabric masks: who wears what when?	–	12.06.2020	631000	208005	540	138	124	1.32 min	0	0	1	0	0	0	0	0	0	0	0	0	0	0	1	0	0	1	0	1
38	WHO	World Health Organisation (WHO)	Five things to know about COVID-19 transmission	–	11.06.2020	631000	171414	1000	188	148	2.41 min	0	1	0	0	0	0	1	0	0	0	0	1	0	0	0	0	0	1	0	1
39	WHO	World Health Organisation (WHO)	Pass the message: Five steps to kicking out coronavirus	–	23.03.2020	631000	82196	1600	54	81	1.33 min	0	0	0	0	1	0	0	0	1	0	0	0	1	0	0	0	1	0	0	1
40	WHO	World Health Organisation (WHO)	What can you do to fight stigma associated with COVID-19?	–	20.03.2020	631000	73417	1300	96	164	1.32 min	1	0	0	0	0	0	0	0	0	1	0	0	1	0	0	0	0	1	0	1
41	WHO	World Health Organisation (WHO)	COVID-19	–	10.04.2020	631000	58939	904	483	391	1.00 min	0	0	0	0	1	0	0	0	0	0	0	1	0	0	0	0	1	0	0	1
42	WHO	World Health Organisation (WHO)	How to break the chains of transmission.	–	23.07.2020	631000	31720	310	32	28	1.29 min	0	0	1	0	0	0	0	0	0	0	0	0	0	0	1	0	0	1	0	1
43	WHO	World Health Organisation (WHO)	Hand washing with the tippy tap	–	31.03.2020	631000	18569	581	58	106	1.15 min	0	0	0	1	0	0	0	0	0	1	0	1	0	0	0	0	0	1	0	1
44	WHO	World Health Organisation (WHO)	COVID-19 – Basic protective measures to protect yourself and everyone else	–	27.04.2020	631000	18397	196	52	–	0.41 min	0	0	0	1	0	0	0	0	0	1	0	1	0	0	0	0	0	1	0	1
45	WHO	World Health Organisation (WHO)	NBA stars support WHO’s response to the coronavirus pandemic	–	22.03.2020	631000	16067	613	57	65	0.42 min	0	0	0	0	0	1	0	0	1	0	0	0	1	0	0	0	1	0	0	1
46	WHO	World Health Organisation (WHO)	A time for patience, not patients.	–	15.04.2020	631000	8858	104	143	23	0.15 min	0	0	0	0	1	0	0	0	0	0	0	1	0	0	0	0	1	0	0	1
47	WHO	World Health Organisation (WHO)	A call to arms (sneezing)	–	15.04.2020	631000	8391	65	74	12	0.15 min	0	0	0	0	1	0	0	0	0	0	0	1	0	0	0	0	1	0	0	1
48	WHO	World Health Organisation (WHO)	20 seconds that saved the world (hand washing)	–	15.04.2020	631000	7069	116	169	55	0.15 min	0	0	0	0	1	0	0	0	0	0	0	1	0	0	0	0	1	0	0	1
49	WHO	World Health Organisation (WHO)	Will you wash your hands with Akili?	–	19.08.2020	631000	5530	135	42	–	2.46 min	0	0	1	0	0	0	0	0	0	0	0	0	0	0	0	1	1	0	1	0
50	WHO	World Health Organisation (WHO)	FIFA, UN, football stars join WHO to help people #BeActive and healthy during COVID-19	–	06.04.2020	631000	4972	114	39	19	1.16 min	0	0	0	0	0	1	0	0	1	0	0	0	1	0	0	0	0	1	0	1
51	WHO	World Health Organisation (WHO)	Alone together	–	15.04.2020	631000	4643	66	59	12	0.15 min	0	0	0	0	1	0	0	0	0	0	0	1	0	0	0	0	1	0	0	1
52	WHO	World Health Organisation (WHO)	Faces should be seen, not touched	–	15.04.2020	631000	4558	60	76	16	0.15 min	0	0	0	0	1	0	0	0	0	0	0	1	0	0	0	0	1	0	0	1
53	WHO	World Health Organisation (WHO)	WHO's Science in 5 on COVID-19 - Reopening schools	–	16.09.2020	631000	4464	55	28	13	5.20 min	0	1	0	0	0	0	1	0	0	0	1	0	0	0	0	0	0	1	0	1
54	WHO	World Health Organisation (WHO)	Safe Hands: Clean your hands with soap and water	–	17.06.2020	631000	4113	144	21	9	1.00 min	0	0	1	0	0	0	0	0	0	0	0	0	0	0	0	1	1	0	0	1
55	WHO	World Health Organisation (WHO)	How to protect yourself in the infodemic	–	26.08.2020	631000	2769	106	72	65	2.10 min	0	0	0	0	1	0	0	0	0	1	0	1	0	0	0	0	1	0	0	1
56	YouTube	Kurzgesagt – In a Nutshell	The Coronavirus Explained & What You Should Do	coronavirus,covid 19	19.03.2020	13300000	27532983	925000	12000	57234	8.34 min	0	0	1	0	0	0	0	0	0	0	0	0	0	0	0	1	1	0	0	1
57	YouTube	VOX	How wildlife trade is linked to coronavirus	coronavirus	06.03.2020	8750000	22645820	395000	22000	57419	8.48 min	0	0	0	0	0	1	1	0	0	0	0	0	1	0	0	0	1	0	0	1
58	YouTube	Nucleus Medical Media	COVID-19 Animation: What Happens If You Get Coronavirus?	coronavirus,covid 19	28.03.2020	2840000	19024456	204000	9500	15224	7.27 min	0	0	1	0	0	0	0	0	0	0	0	0	0	0	0	1	1	0	0	1
59	YouTube	Mark Rober	How To See Germs Spread Experiment (Coronavirus)	coronavirus	18.03.2020	14700000	18495371	555000	8500	31107	10.20 min	0	0	0	1	0	0	0	1	0	0	0	1	0	0	0	0	1	0	0	1
60	YouTube	Science Insider	What Coronavirus Symptoms Look Like, Day By Day	coronavirus,covid 19	18.03.2020	1470000	16004150	199000	5900	17363	5.18 min	0	0	1	0	0	0	0	0	0	0	0	0	0	0	1	0	0	1	0	1
61	YouTube	Duc C. Vuong	HOW COVID-19 KILLS--I'm a Surgeon--And Why We Can't Save You	covid 19	23.03.2020	328000	15932282	273000	14000	42099	34.47 min	1	0	0	0	0	0	0	1	0	0	0	1	0	0	0	0	0	1	0	1
62	YouTube	LastWeekTonight	Coronavirus: Last Week Tonight with John Oliver (HBO)	coronavirus	02.03.2020	8420000	15190808	302000	12000	25981	20.09 min	1	0	0	0	0	0	0	1	0	0	0	0	1	0	0	0	1	0	1	0
63	YouTube	60 Minutes Australia	Journalist goes undercover at "wet markets", where the Coronavirus started | 60 Minutes Australia	coronavirus	08.03.2020	2620000	15002031	106000	14000	–	27.30 min	0	0	0	0	0	1	0	1	0	0	0	1	0	0	0	0	1	0	0	1
64	YouTube	AsapSCIENCE	What Actually Happens If You Get Coronavirus?	coronavirus	29.01.2020	9450000	12486130	438000	13000	34677	8.26 min	0	0	0	0	0	1	0	1	0	0	0	0	1	0	0	0	0	1	0	1
65	YouTube	LastWeekTonight	Coronavirus II: Last Week Tonight with John Oliver (HBO)	coronavirus	15.03.2020	8420000	12031868	356000	9700	38208	22.10 min	1	0	0	0	0	0	0	1	0	0	0	0	1	0	0	0	1	0	1	0
66	YouTube	The Daily Show with Trevor Noah	Dr. Fauci Answers Trevor’s Questions About Coronavirus | The Daily Social Distancing Show	coronavirus	26.03.2020	8540000	11818158	173000	9300	24080	13.23 min	0	1	0	0	0	0	0	1	0	0	0	1	0	0	0	0	0	1	0	1
67	YouTube	LastWeekTonight	Coronavirus III: Last Week Tonight with John Oliver (HBO)	coronavirus	29.03.2020	8420000	10187807	298000	10000	39741	19.28 min	1	0	0	0	0	0	0	1	0	0	0	0	1	0	0	0	1	0	1	0
68	YouTube	FreeMedEducation	Recognizing Day to Day Signs and Symptoms of Coronavirus	coronavirus	25.04.2020	225000	9768051	80000	5100	14046	3.50 min	0	0	1	0	0	0	0	0	0	0	0	0	0	0	0	1	1	0	0	1
69	YouTube	Guardian News	What is the coronavirus?	coronavirus	23.01.2020	1370000	9716760	175000	4600	18853	3.40 min	0	0	0	0	0	b	1	0	0	0	0	1	0	0	0	0	0	1	0	1
70	YouTube	Vox	How soap kills the coronavirus	coronavirus	18.03.2020	8750000	9707641	212000	3900	9592	3.44 min	0	0	0	1	0	0	0	0	0	0	0	0	1	0	0	0	0	1	0	1
71	YouTube	Tom MacDonald	Tom MacDonald -"Coronavirus"	coronavirus	18.03.2020	1300000	9042186	246000	14000	24512	3.08 min	0	0	0	0	1	0	0	0	1	0	0	1	0	0	0	0	1	0	0	1
72	YouTube	minutephysics	How To Tell If We're Beating COVID-19	covid 19	27.03.2020	5170000	6087740	149000	5700	17517	7.15 min	0	0	1	0	0	0	0	0	0	0	0	0	0	0	1	0	0	1	0	1
73	YouTube	Ninja Nerd Lectures	COVID-19 | Coronavirus: Epidemiology, Pathophysiology, Diagnostics	covid 19	16.03.2020	719000	5055236	85000	2900	8481	50.38 min	1	0	0	0	0	0	0	1	0	0	0	1	0	0	0	0	0	1	0	1
74	YouTube	Late Night with Seth Meyers	Trump Has Election Meltdown as White House Covers Up COVID-19 Outbreak: A Closer Look	covid 19	08.10.2020	3920000	4787599	72000	4000	13039	21.44 min	1	0	0	0	0	0	0	1	0	0	0	0	1	0	0	0	1	0	1	0
75	YouTube	World Health Organisation (WHO)	How to protect yourself against COVID-19	covid 19	28.02.2020	631000	4745769	97000	2200	2195	1.30 min	0	0	1	0	0	0	0	0	0	0	0	0	0	0	1	0	0	1	0	1
76	YouTube	Neural Academy	HOW DOES COVID-19 AFFECT THE BODY?	covid 19	25.02.2020	193000	4523140	30000	2500	–	5.14 min	0	0	1	0	0	0	0	0	0	0	0	0	0	0	1	0	0	1	0	1
77	YouTube	It’s Okay To Be Smart	What This Chart Actually Means for COVID-19	covid 19	17.03.2020	3480000	3668233	113000	1.9K	7367	8.20 min	0	0	0	0	0	1	0	1	0	0	0	0	1	0	0	0	1	0	0	1
78	YouTube	Jimmy Kimmel Live	Jimmy Kimmel on Trump's COVID-19 Diagnosis	covid 19	02.10.2020	17200000	2979311	53000	7400	8859	6.30 min	1	0	0	0	0	0	0	1	0	0	0	0	1	0	0	0	1	0	1	0
79	YouTube	Late Night with Seth Meyers	Trump Stages Maskless Photo Op While Still Infected with COVID-19: A Closer Look	covid 19	06.10.2020	3920000	2364603	42000	1300	6641	11.58 min	1	0	0	0	0	0	0	1	0	0	0	0	1	0	0	0	1	0	1	0
80	YouTube	Uncle Bob	Covid-19 vs Surgical Mask. Do Masks Work Or Not?	covid 19	28.07.2020	353000	2265435	42000	2500	5314	3.47 min	0	0	0	1	0	0	0	1	0	0	0	1	0	0	0	0	1	0	1	0
81	YouTube	Centers for Disease Control and Prevention (CDC)	10 Things You Can Do to Manage COVID-19 at Home	covid 19	13.03.2020	486000	1969044	11000	1400	–	1.13 min	1	0	0	0	0	0	1	0	0	0	0	0	1	0	0	0	0	1	0	1
82	YouTube	BrainPOP	Coronavirus: How to Teach Kids About COVID-19 | BrainPOP	covid 19	23.03.2020	97200	1357396	7800	519	–	4.32 min	0	0	1	0	0	0	0	0	0	0	0	0	0	0	0	1	1	0	1	0
			Total				296982234	5814462	214928	529670		23	4	25	9	13	7	10	14	11	15	10	24	22	7	12	6	38	43	13	68
